# Supplementary material for: The catalytic influence of phosphotungstic acid-functionalized Fe3O4 MNPs blended with TiO2 on the synthesis of novel spiro-acridines and the evaluation of their medicinal potential through molecular docking studies
Source: Royal Society of Chemistry journal article supplement (doi:10.1039/d0ra06975b), 2020-01-01
Supplement: d0ra06975b1.pdf [file d0ra06975b1.pdf]

ACR-TOLU  
1H\_8scan DMSO {D:\Spectra} nmr 28

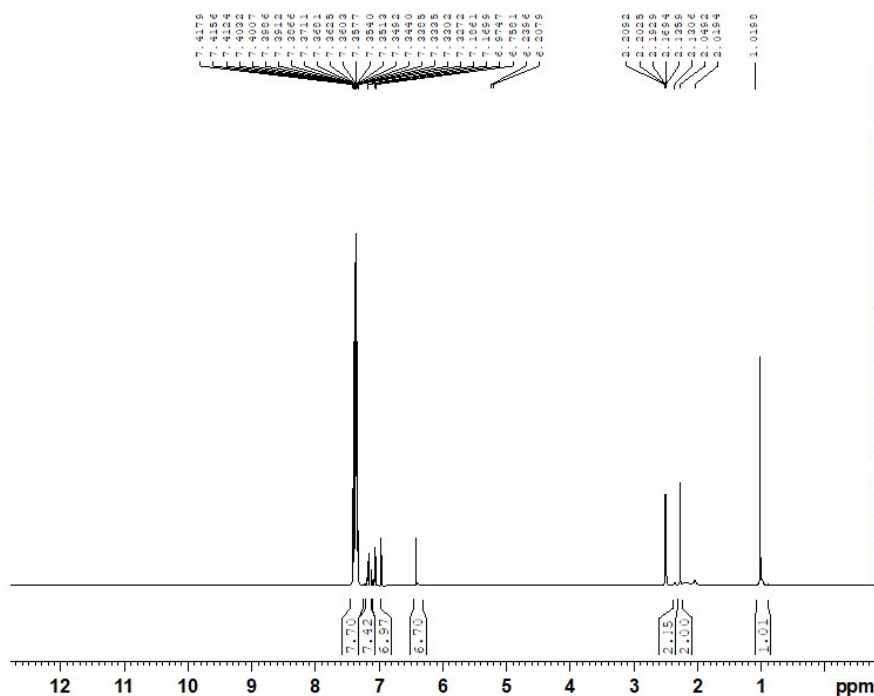

(4h) 10-(2-chlorophenyl)-3,3,6-tetramethyl-4',4'-diphenyl-3,4,6,7-tetrahydro-1H-spiro[acridine-9,2'-imidazolidine]-1,5',8(2H,5H,10H)-trione



ACR-TOLU  
1H\_8scan DMSO {D:\Spectra} nmr 28

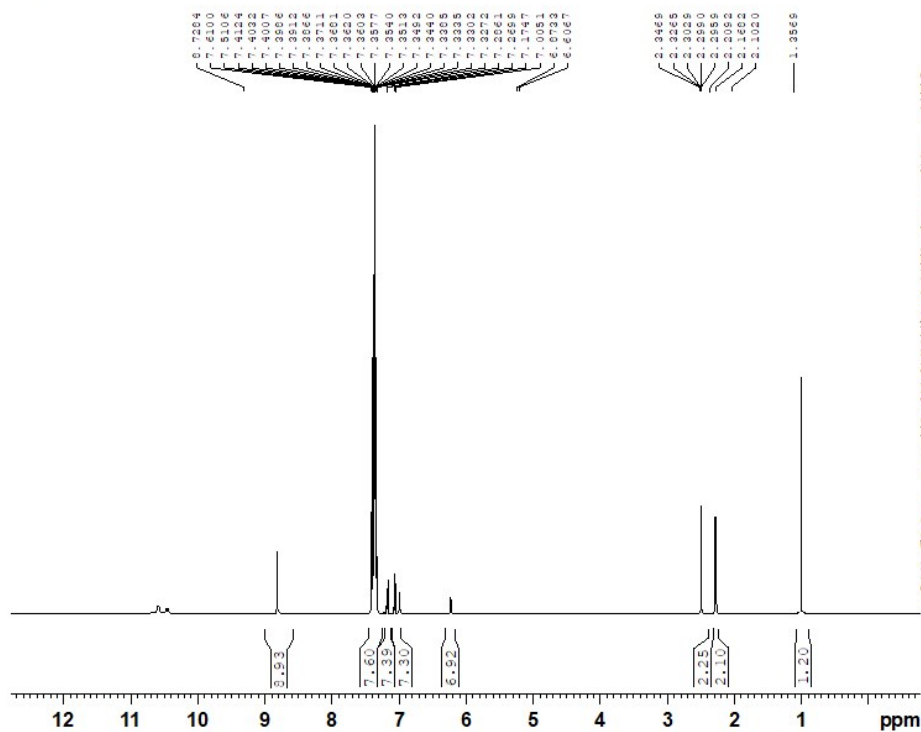

BRUKER  
AVANCE NEO  
500 MHz NMR  
SPECTROMETER  
SAIF, P.U.

Current Data Parameters  
NAME May22-2020  
EXPNO 280  
PROCNO 1

F2 - Acquisition Parameters  
Date 20200525  
Time 11.14 h  
INSTRUM Avance Neo 500  
PROBHD Z119470\_0333 (  
PULPROG zg30  
TD 65536  
SOLVENT DMSO  
NS 56  
DS 0  
SWH 14705.883 Hz  
FIDRES 0.448788 Hz  
AQ 2.2282240 sec  
RG 95.7854  
DW 34.000 usec  
DE 6.79 usec  
TE 298.1 K  
D1 1.00000000 sec  
TDO 1  
SFO1 500.1730885 MHz  
NUC1 1H  
P0 3.33 usec  
P1 10.00 usec  
PLW1 22.02300072 W

F2 - Processing parameters  
SI 65536  
SF 500.1700024 MHz  
WDW EM  
SSB 0  
LB 0.30 Hz  
GB 0  
PC 1.00

(4i) 3,3,6,6-tetramethyl-10-(2-nitrophenyl)-4',4'-diphenyl-3,4,6,7-tetrahydro-1H-spiro[acridine-9,2'-imidazolidine]-1,5',8(2H,5H,10H)-trione



**XRD DATA OF Fe<sub>3</sub>O<sub>4</sub>@TiO<sub>2</sub>-PTA:**

; C:\DIFFDAT1\DATA\USERS\DAVV\SCS\Shweta Potdar\Mar\_13\_20\Exported\13Mar20\_FTP\_DLL 018.raw(Diffrac Plus V1.01 file) converted by XCH V1.0

\_FILEVERSION=2  
\_SAMPLE='S1'  
\_SITE='Indien'  
\_USER='Administrator'  
\_SAMPLE\_CHANGER\_CODE=4  
\_ATTACHMENTS\_CODE=0  
\_GONIOMETER\_RADIUS=250.000000  
\_FIXED\_DIVSLIT=0.600000  
\_FIXED\_SAMPLESLIT=0.000000  
\_FIXED\_DETSLIT=8.170000  
\_MONOCHROMATOR=0  
; None  
\_THIN\_FILM='N'  
\_BETA\_FILTER='N'  
\_FIXED\_ANTISLIT=5.810000  
\_ANALYZER\_CODE=1  
; Graphite  
\_DATEMEASURED='13-Mar-2020 11:55:40'  
\_WL\_UNIT='A'  
\_WL1=1.540600  
\_WL2=1.544390  
\_WL3=1.392220  
\_WLRATIO=0.500000  
\_ANODE='Cu'  
; (Data for Range number 1)  
\_DRIVE='COUPLED'  
\_STEPTIME=115.000000  
\_STEPSIZE=0.049955  
\_STEPMODE='C'  
\_START=20.000000  
\_THETA=10.000000  
\_2THETA=20.000000  
\_KHI=0.000000  
\_PHI=0.000000  
\_X=0.000000  
\_Y=0.000000  
\_Z=0.000000  
\_DIVERGENCE=0.000000  
\_ANTISCATTER=0.000000  
\_DETECTOR=5  
\_DETECTORSLIT='unkn'  
\_AUX1=0.000000  
\_AUX2=0.000000  
\_AUX3=0.000000  
\_TIMESTARTED=11.000000  
\_TEMP\_RATE=-1.000000  
\_TEMP\_DELAY=-1.000000  
\_KV=40  
\_MA=40

\_RANGE\_WL=1.540600

\_3DPLANE=0

\_2THETACOUNTS

20.0000 161

20.0500 171

20.0999 134

20.1499 146

20.1998 174

20.2498 169

20.2997 180

20.3497 184

20.3996 155

20.4496 168

20.4995 198

20.5495 205

20.5995 204

20.6494 197

20.6994 228

20.7493 227

20.7993 204

20.8492 178

20.8992 157

20.9491 154

20.9991 147

21.0491 162

21.0990 159

21.1490 159

21.1989 147

21.2489 146

21.2988 172

21.3488 150

21.3987 141

21.4487 140

21.4986 158

21.5486 144

21.5986 142

21.6485 140

21.6985 169

21.7484 147

21.7984 146

21.8483 135

21.8983 144

21.9482 143

21.9982 144

22.0481 151

22.0981 124

22.1481 149

22.1980 121

22.2480 171

22.2979 141

22.3479 140

22.3978 153

22.4478 156

22.4977 135  
22.5477 126  
22.5976 153  
22.6476 147  
22.6976 125  
22.7475 159  
22.7975 151  
22.8474 159  
22.8974 166  
22.9473 167  
22.9973 179  
23.0472 203  
23.0972 205  
23.1472 224  
23.1971 177  
23.2471 158  
23.2970 157  
23.3470 162  
23.3969 158  
23.4469 156  
23.4968 159  
23.5468 144  
23.5967 145  
23.6467 162  
23.6967 140  
23.7466 132  
23.7966 157  
23.8465 129  
23.8965 143  
23.9464 144  
23.9964 142  
24.0463 165  
24.0963 144  
24.1462 173  
24.1962 145  
24.2462 159  
24.2961 144  
24.3461 167  
24.3960 155  
24.4460 171  
24.4959 192  
24.5459 144  
24.5958 179  
24.6458 158  
24.6958 156  
24.7457 182  
24.7957 174  
24.8456 195  
24.8956 179  
24.9455 231  
24.9955 270  
25.0454 279  
25.0954 370

25.1453 479  
25.1953 578  
25.2453 673  
25.2952 802  
25.3452 787  
25.3951 778  
25.4451 708  
25.4950 554  
25.5450 456  
25.5949 341  
25.6449 305  
25.6948 279  
25.7448 231  
25.7948 241  
25.8447 208  
25.8947 192  
25.9446 194  
25.9946 183  
26.0445 192  
26.0945 162  
26.1444 180  
26.1944 200  
26.2444 190  
26.2943 189  
26.3443 155  
26.3942 186  
26.4442 219  
26.4941 186  
26.5441 206  
26.5940 198  
26.6440 196  
26.6939 198  
26.7439 186  
26.7939 206  
26.8438 177  
26.8938 188  
26.9437 186  
26.9937 201  
27.0436 228  
27.0936 225  
27.1435 313  
27.1935 322  
27.2434 318  
27.2934 344  
27.3434 461  
27.3933 545  
27.4433 508  
27.4932 542  
27.5432 531  
27.5931 415  
27.6431 346  
27.6930 316  
27.7430 296

27.7929 262  
27.8429 256  
27.8929 244  
27.9428 215  
27.9928 209  
28.0427 206  
28.0927 212  
28.1426 183  
28.1926 193  
28.2425 172  
28.2925 201  
28.3425 160  
28.3924 171  
28.4424 177  
28.4923 182  
28.5423 157  
28.5922 167  
28.6422 160  
28.6921 151  
28.7421 173  
28.7920 166  
28.8420 181  
28.8920 136  
28.9419 158  
28.9919 184  
29.0418 182  
29.0918 175  
29.1417 158  
29.1917 171  
29.2416 173  
29.2916 208  
29.3415 223  
29.3915 239  
29.4415 219  
29.4914 194  
29.5414 181  
29.5913 193  
29.6413 165  
29.6912 172  
29.7412 178  
29.7911 156  
29.8411 166  
29.8911 169  
29.9410 158  
29.9910 145  
30.0409 164  
30.0909 163  
30.1408 159  
30.1908 169  
30.2407 159  
30.2907 171  
30.3406 168  
30.3906 132

30.4406 147  
30.4905 159  
30.5405 164  
30.5904 150  
30.6404 147  
30.6903 160  
30.7403 157  
30.7902 174  
30.8402 150  
30.8901 176  
30.9401 177  
30.9901 165  
31.0400 158  
31.0900 183  
31.1399 165  
31.1899 149  
31.2398 182  
31.2898 189  
31.3397 168  
31.3897 183  
31.4396 145  
31.4896 176  
31.5396 140  
31.5895 165  
31.6395 171  
31.6894 164  
31.7394 148  
31.7893 142  
31.8393 143  
31.8892 128  
31.9392 150  
31.9892 155  
32.0391 140  
32.0891 146  
32.1390 142  
32.1890 147  
32.2389 157  
32.2889 152  
32.3388 165  
32.3888 188  
32.4387 197  
32.4887 168  
32.5387 177  
32.5886 173  
32.6386 166  
32.6885 180  
32.7385 164  
32.7884 171  
32.8384 220  
32.8883 166  
32.9383 191  
32.9882 193  
33.0382 204



33.0882 237  
33.1381 224  
33.1881 236  
33.2380 192  
33.2880 196  
33.3379 159  
33.3879 143  
33.4378 154  
33.4878 150  
33.5378 166  
33.5877 149  
33.6377 142  
33.6876 157  
33.7376 153  
33.7875 154  
33.8375 151  
33.8874 143  
33.9374 165  
33.9873 140  
34.0373 140  
34.0873 150  
34.1372 147  
34.1872 166  
34.2371 155  
34.2871 172  
34.3370 161  
34.3870 165  
34.4369 217  
34.4869 192  
34.5368 241  
34.5868 249  
34.6368 296  
34.6867 248  
34.7367 199  
34.7866 168  
34.8366 163  
34.8865 152  
34.9365 158  
34.9864 179  
35.0364 148  
35.0863 168  
35.1363 144  
35.1863 157  
35.2362 140  
35.2862 146  
35.3361 153  
35.3861 154  
35.4360 175  
35.4860 181  
35.5359 197  
35.5859 203  
35.6359 191  
35.6858 224

35.7358 204  
35.7857 225  
35.8357 252  
35.8856 230  
35.9356 258  
35.9855 324  
36.0355 349  
36.0854 414  
36.1354 346  
36.1854 321  
36.2353 253  
36.2853 236  
36.3352 223  
36.3852 191  
36.4351 156  
36.4851 161  
36.5350 161  
36.5850 164  
36.6349 154  
36.6849 162  
36.7349 167  
36.7848 174  
36.8348 150  
36.8847 161  
36.9347 167  
36.9846 189  
37.0346 167  
37.0845 158  
37.1345 165  
37.1845 163  
37.2344 148  
37.2844 147  
37.3343 147  
37.3843 153  
37.4342 161  
37.4842 171  
37.5341 202  
37.5841 193  
37.6340 238  
37.6840 263  
37.7340 265  
37.7839 252  
37.8339 262  
37.8838 229  
37.9338 241  
37.9837 187  
38.0337 207  
38.0836 164  
38.1336 176  
38.1835 158  
38.2335 186  
38.2835 174  
38.3334 139

38.3834 168  
38.4333 171  
38.4833 175  
38.5332 155  
38.5832 174  
38.6331 164  
38.6831 164  
38.7330 163  
38.7830 129  
38.8330 137  
38.8829 153  
38.9329 141  
38.9828 147  
39.0328 139  
39.0827 164  
39.1327 158  
39.1826 158  
39.2326 146  
39.2826 143  
39.3325 130  
39.3825 143  
39.4324 120  
39.4824 143  
39.5323 125  
39.5823 147  
39.6322 121  
39.6822 140  
39.7321 136  
39.7821 110  
39.8321 122  
39.8820 119  
39.9320 113  
39.9819 108  
40.0319 134  
40.0818 125  
40.1318 119  
40.1817 141  
40.2317 117  
40.2816 126  
40.3316 135  
40.3816 157  
40.4315 160  
40.4815 124  
40.5314 131  
40.5814 148  
40.6313 145  
40.6813 127  
40.7312 139  
40.7812 147  
40.8312 157  
40.8811 159  
40.9311 173  
40.9810 141

41.0310 162  
41.0809 158  
41.1309 210  
41.1808 236  
41.2308 252  
41.2807 253  
41.3307 212  
41.3807 192  
41.4306 165  
41.4806 149  
41.5305 136  
41.5805 130  
41.6304 137  
41.6804 144  
41.7303 126  
41.7803 131  
41.8302 124  
41.8802 120  
41.9302 152  
41.9801 123  
42.0301 144  
42.0800 133  
42.1300 142  
42.1799 134  
42.2299 138  
42.2798 134  
42.3298 134  
42.3798 133  
42.4297 131  
42.4797 141  
42.5296 123  
42.5796 138  
42.6295 138  
42.6795 135  
42.7294 121  
42.7794 153  
42.8293 120  
42.8793 140  
42.9293 127  
42.9792 135  
43.0292 105  
43.0791 117  
43.1291 126  
43.1790 129  
43.2290 146  
43.2789 129  
43.3289 116  
43.3788 111  
43.4288 122  
43.4788 122  
43.5287 123  
43.5787 146  
43.6286 129

43.6786 141  
43.7285 131  
43.7785 130  
43.8284 150  
43.8784 156  
43.9283 154  
43.9783 163  
44.0283 177  
44.0782 186  
44.1282 156  
44.1781 128  
44.2281 142  
44.2780 136  
44.3280 132  
44.3779 151  
44.4279 143  
44.4779 120  
44.5278 128  
44.5778 149  
44.6277 125  
44.6777 143  
44.7276 138  
44.7776 131  
44.8275 133  
44.8775 154  
44.9274 113  
44.9774 124  
45.0274 107  
45.0773 132  
45.1273 131  
45.1772 114  
45.2272 120  
45.2771 131  
45.3271 105  
45.3770 143  
45.4270 123  
45.4769 133  
45.5269 132  
45.5769 125  
45.6268 131  
45.6768 147  
45.7267 124  
45.7767 137  
45.8266 158  
45.8766 160  
45.9265 128  
45.9765 195  
46.0265 164  
46.0764 155  
46.1264 171  
46.1763 173  
46.2263 150  
46.2762 146

46.3262 139  
46.3761 122  
46.4261 113  
46.4760 118  
46.5260 137  
46.5760 111  
46.6259 130  
46.6759 129  
46.7258 127  
46.7758 126  
46.8257 118  
46.8757 115  
46.9256 123  
46.9756 137  
47.0255 116  
47.0755 129  
47.1255 135  
47.1754 143  
47.2254 134  
47.2753 159  
47.3253 137  
47.3752 140  
47.4252 150  
47.4751 126  
47.5251 129  
47.5750 135  
47.6250 155  
47.6750 136  
47.7249 181  
47.7749 157  
47.8248 192  
47.8748 192  
47.9247 215  
47.9747 235  
48.0246 238  
48.0746 262  
48.1246 240  
48.1745 201  
48.2245 231  
48.2744 210  
48.3244 173  
48.3743 162  
48.4243 167  
48.4742 173  
48.5242 178  
48.5741 157  
48.6241 137  
48.6741 158  
48.7240 136  
48.7740 155  
48.8239 151  
48.8739 141  
48.9238 120

48.9738 141  
49.0237 125  
49.0737 130  
49.1236 152  
49.1736 136  
49.2236 122  
49.2735 144  
49.3235 122  
49.3734 154  
49.4234 140  
49.4733 142  
49.5233 154  
49.5732 126  
49.6232 133  
49.6732 157  
49.7231 122  
49.7731 153  
49.8230 128  
49.8730 139  
49.9229 127  
49.9729 118  
50.0228 122  
50.0728 133  
50.1227 125  
50.1727 119  
50.2227 139  
50.2726 135  
50.3226 132  
50.3725 129  
50.4225 139  
50.4724 122  
50.5224 113  
50.5723 119  
50.6223 120  
50.6722 105  
50.7222 115  
50.7722 125  
50.8221 113  
50.8721 110  
50.9220 101  
50.9720 116  
51.0219 128  
51.0719 122  
51.1218 126  
51.1718 116  
51.2218 130  
51.2717 114  
51.3217 130  
51.3716 119  
51.4216 109  
51.4715 116  
51.5215 121  
51.5714 116

51.6214 115  
51.6713 110  
51.7213 113  
51.7713 95  
51.8212 121  
51.8712 141  
51.9211 117  
51.9711 107  
52.0210 110  
52.0710 117  
52.1209 128  
52.1709 103  
52.2208 118  
52.2708 129  
52.3208 107  
52.3707 124  
52.4207 101  
52.4706 131  
52.5206 111  
52.5705 136  
52.6205 149  
52.6704 130  
52.7204 119  
52.7703 123  
52.8203 140  
52.8703 131  
52.9202 136  
52.9702 135  
53.0201 144  
53.0701 145  
53.1200 184  
53.1700 168  
53.2199 217  
53.2699 179  
53.3199 169  
53.3698 180  
53.4198 190  
53.4697 163  
53.5197 171  
53.5696 171  
53.6196 161  
53.6695 155  
53.7195 196  
53.7694 183  
53.8194 209  
53.8694 230  
53.9193 250  
53.9693 230  
54.0192 297  
54.0692 288  
54.1191 324  
54.1691 320  
54.2190 395



54.2690 427  
54.3189 424  
54.3689 388  
54.4189 386  
54.4688 334  
54.5188 283  
54.5687 268  
54.6187 210  
54.6686 215  
54.7186 177  
54.7685 221  
54.8185 178  
54.8685 198  
54.9184 232  
54.9684 212  
55.0183 215  
55.0683 239  
55.1182 207  
55.1682 190  
55.2181 224  
55.2681 199  
55.3180 169  
55.3680 155  
55.4180 146  
55.4679 176  
55.5179 177  
55.5678 150  
55.6178 141  
55.6677 144  
55.7177 141  
55.7676 142  
55.8176 131  
55.8675 162  
55.9175 128  
55.9675 162  
56.0174 135  
56.0674 136  
56.1173 140  
56.1673 145  
56.2172 120  
56.2672 157  
56.3171 139  
56.3671 163  
56.4170 166  
56.4670 194  
56.5170 176  
56.5669 181  
56.6169 207  
56.6668 159  
56.7168 183  
56.7667 175  
56.8167 140  
56.8666 175

56.9166 133  
56.9666 135  
57.0165 144  
57.0665 127  
57.1164 131  
57.1664 122  
57.2163 127  
57.2663 132  
57.3162 119  
57.3662 118  
57.4161 119  
57.4661 120  
57.5161 132  
57.5660 142  
57.6160 132  
57.6659 137  
57.7159 126  
57.7658 135  
57.8158 110  
57.8657 95  
57.9157 129  
57.9656 116  
58.0156 115  
58.0656 114  
58.1155 131  
58.1655 147  
58.2154 110  
58.2654 100  
58.3153 138  
58.3653 124  
58.4152 100  
58.4652 132  
58.5152 155  
58.5651 127  
58.6151 117  
58.6650 126  
58.7150 123  
58.7649 135  
58.8149 125  
58.8648 113  
58.9148 112  
58.9647 112  
59.0147 130  
59.0647 121  
59.1146 95  
59.1646 118  
59.2145 126  
59.2645 128  
59.3144 132  
59.3644 139  
59.4143 120  
59.4643 110  
59.5142 140

59.5642 128  
59.6142 125  
59.6641 149  
59.7141 150  
59.7640 157  
59.8140 140  
59.8639 211  
59.9139 182  
59.9638 145  
60.0138 158  
60.0637 167  
60.1137 163  
60.1637 128  
60.2136 125  
60.2636 122  
60.3135 143  
60.3635 114  
60.4134 114  
60.4634 115  
60.5133 116  
60.5633 115  
60.6133 120  
60.6632 118  
60.7132 130  
60.7631 113  
60.8131 117  
60.8630 112  
60.9130 123  
60.9629 120  
61.0129 114  
61.0628 119  
61.1128 101  
61.1628 102  
61.2127 117  
61.2627 115  
61.3126 119  
61.3626 122  
61.4125 113  
61.4625 141  
61.5124 135  
61.5624 105  
61.6123 115  
61.6623 130  
61.7123 127  
61.7622 125  
61.8122 146  
61.8621 139  
61.9121 150  
61.9620 157  
62.0120 162  
62.0619 144  
62.1119 170  
62.1619 169

62.2118 179  
62.2618 145  
62.3117 170  
62.3617 175  
62.4116 158  
62.4616 188  
62.5115 211  
62.5615 202  
62.6114 215  
62.6614 199  
62.7114 210  
62.7613 204  
62.8113 232  
62.8612 198  
62.9112 187  
62.9611 188  
63.0111 172  
63.0610 167  
63.1110 129  
63.1609 137  
63.2109 120  
63.2609 153  
63.3108 126  
63.3608 115  
63.4107 126  
63.4607 145  
63.5106 115  
63.5606 116  
63.6105 101  
63.6605 119  
63.7105 130  
63.7604 138  
63.8104 137  
63.8603 133  
63.9103 153  
63.9602 158  
64.0102 170  
64.0601 151  
64.1101 157  
64.1600 144  
64.2100 155  
64.2600 134  
64.3099 142  
64.3599 118  
64.4098 122  
64.4598 125  
64.5097 129  
64.5597 104  
64.6096 134  
64.6596 126  
64.7095 117  
64.7595 114  
64.8095 109

64.8594 119  
64.9094 135  
64.9593 126  
65.0093 127  
65.0592 144  
65.1092 146  
65.1591 123  
65.2091 118  
65.2590 118  
65.3090 114  
65.3590 122  
65.4089 130  
65.4589 121  
65.5088 114  
65.5588 106  
65.6087 121  
65.6587 101  
65.7086 120  
65.7586 118  
65.8086 111  
65.8585 94  
65.9085 108  
65.9584 108  
66.0084 124  
66.0583 122  
66.1083 105  
66.1582 126  
66.2082 89  
66.2581 118  
66.3081 102  
66.3581 112  
66.4080 110  
66.4580 110  
66.5079 106  
66.5579 126  
66.6078 103  
66.6578 105  
66.7077 116  
66.7577 95  
66.8076 104  
66.8576 93  
66.9076 95  
66.9575 99  
67.0075 122  
67.0574 108  
67.1074 95  
67.1573 92  
67.2073 111  
67.2572 103  
67.3072 126  
67.3572 121  
67.4071 104  
67.4571 111

67.5070 116  
67.5570 114  
67.6069 117  
67.6569 117  
67.7068 97  
67.7568 122  
67.8067 114  
67.8567 101  
67.9067 120  
67.9566 122  
68.0066 106  
68.0565 125  
68.1065 136  
68.1564 119  
68.2064 100  
68.2563 114  
68.3063 126  
68.3562 126  
68.4062 123  
68.4562 124  
68.5061 121  
68.5561 136  
68.6060 149  
68.6560 169  
68.7059 151  
68.7559 152  
68.8058 164  
68.8558 185  
68.9057 167  
68.9557 201  
69.0057 182  
69.0556 178  
69.1056 170  
69.1555 158  
69.2055 163  
69.2554 141  
69.3054 140  
69.3553 139  
69.4053 140  
69.4553 143  
69.5052 128  
69.5552 142  
69.6051 129  
69.6551 129  
69.7050 134  
69.7550 137  
69.8049 131  
69.8549 142  
69.9048 125  
69.9548 160  
70.0048 148  
70.0547 127  
70.1047 138

70.1546 152  
70.2046 129  
70.2545 146  
70.3045 144  
70.3544 151  
70.4044 116  
70.4543 130  
70.5043 122  
70.5543 114  
70.6042 113  
70.6542 122  
70.7041 105  
70.7541 97  
70.8040 118  
70.8540 85  
70.9039 97  
70.9539 92  
71.0039 106  
71.0538 110  
71.1038 119  
71.1537 98  
71.2037 95  
71.2536 105  
71.3036 126  
71.3535 107  
71.4035 106  
71.4534 94  
71.5034 85  
71.5534 90  
71.6033 86  
71.6533 101  
71.7032 88  
71.7532 105  
71.8031 100  
71.8531 104  
71.9030 117  
71.9530 103  
72.0029 111  
72.0529 90  
72.1029 114  
72.1528 108  
72.2028 95  
72.2527 103  
72.3027 118  
72.3526 97  
72.4026 90  
72.4525 101  
72.5025 106  
72.5524 93  
72.6024 97  
72.6524 108  
72.7023 85  
72.7523 83

72.8022 117  
72.8522 84  
72.9021 82  
72.9521 108  
73.0020 107  
73.0520 86  
73.1020 100  
73.1519 95  
73.2019 91  
73.2518 105  
73.3018 83  
73.3517 108  
73.4017 112  
73.4516 101  
73.5016 119  
73.5515 116  
73.6015 106  
73.6515 98  
73.7014 112  
73.7514 109  
73.8013 100  
73.8513 103  
73.9012 83  
73.9512 98  
74.0011 100  
74.0511 106  
74.1010 118  
74.1510 94  
74.2010 108  
74.2509 120  
74.3009 108  
74.3508 103  
74.4008 109  
74.4507 98  
74.5007 96  
74.5506 99  
74.6006 119  
74.6506 86  
74.7005 111  
74.7505 118  
74.8004 104  
74.8504 123  
74.9003 114  
74.9503 132  
75.0002 132  
75.0502 123  
75.1001 130  
75.1501 124  
75.2001 138  
75.2500 106  
75.3000 137  
75.3499 128  
75.3999 119



75.4498 114  
75.4998 103  
75.5497 109  
75.5997 108  
75.6496 86  
75.6996 116  
75.7496 102  
75.7995 127  
75.8495 101  
75.8994 120  
75.9494 100  
75.9993 135  
76.0493 111  
76.0992 99  
76.1492 109  
76.1992 99  
76.2491 101  
76.2991 121  
76.3490 117  
76.3990 103  
76.4489 132  
76.4989 124  
76.5488 116  
76.5988 111  
76.6487 102  
76.6987 111  
76.7487 98  
76.7986 85  
76.8486 110  
76.8985 110  
76.9485 118  
76.9984 102  
77.0484 115  
77.0983 95  
77.1483 82  
77.1982 128  
77.2482 96  
77.2982 96  
77.3481 91  
77.3981 104  
77.4480 93  
77.4980 99  
77.5479 114  
77.5979 77  
77.6478 104  
77.6978 106  
77.7477 111  
77.7977 80  
77.8477 112  
77.8976 95  
77.9476 100  
77.9975 99  
78.0475 81

78.0974 86  
78.1474 98  
78.1973 113  
78.2473 106  
78.2973 102  
78.3472 101  
78.3972 101  
78.4471 117  
78.4971 98  
78.5470 105  
78.5970 99  
78.6469 106  
78.6969 97  
78.7468 82  
78.7968 96  
78.8468 117  
78.8967 86  
78.9467 87  
78.9966 99  
79.0466 110  
79.0965 99  
79.1465 103  
79.1964 114  
79.2464 93  
79.2963 97  
79.3463 126  
79.3963 112  
79.4462 107  
79.4962 115  
79.5461 117  
79.5961 105  
79.6460 120  
79.6960 119  
79.7459 96  
79.7959 110  
79.8459 110  
79.8958 82  
79.9458 113  
79.9957 122  
80.0457 105  
80.0956 119  
80.1456 117  
80.1955 111  
80.2455 102  
80.2954 99  
80.3454 113  
80.3954 110  
80.4453 91  
80.4953 115  
80.5452 100  
80.5952 104  
80.6451 114  
80.6951 122

80.7450 114  
80.7950 121  
80.8449 112  
80.8949 114  
80.9449 103  
80.9948 103  
81.0448 122  
81.0947 98  
81.1447 107  
81.1946 106  
81.2446 100  
81.2945 116  
81.3445 99  
81.3944 124  
81.4444 107  
81.4944 121  
81.5443 116  
81.5943 94  
81.6442 109  
81.6942 100  
81.7441 129  
81.7941 111  
81.8440 95  
81.8940 115  
81.9440 107  
81.9939 96  
82.0439 125  
82.0938 141  
82.1438 131  
82.1937 123  
82.2437 129  
82.2936 102  
82.3436 133  
82.3935 144  
82.4435 127  
82.4935 126  
82.5434 111  
82.5934 133  
82.6433 152  
82.6933 145  
82.7432 134  
82.7932 109  
82.8431 125  
82.8931 123  
82.9430 144  
82.9930 140  
83.0430 121  
83.0929 118  
83.1429 141  
83.1928 140  
83.2428 119  
83.2927 132  
83.3427 118

83.3926 103  
83.4426 110  
83.4926 114  
83.5425 116  
83.5925 99  
83.6424 89  
83.6924 103  
83.7423 119  
83.7923 109  
83.8422 99  
83.8922 99  
83.9421 119  
83.9921 115  
84.0421 113  
84.0920 125  
84.1420 125  
84.1919 112  
84.2419 122  
84.2918 116  
84.3418 117  
84.3917 103  
84.4417 117  
84.4916 87  
84.5416 115  
84.5916 106  
84.6415 102  
84.6915 110  
84.7414 111  
84.7914 120  
84.8413 107  
84.8913 129  
84.9412 93  
84.9912 96  
85.0411 104  
85.0911 137  
85.1411 109  
85.1910 123  
85.2410 100  
85.2909 121  
85.3409 109  
85.3908 121  
85.4408 104  
85.4907 95  
85.5407 98  
85.5907 97  
85.6406 102  
85.6906 107  
85.7405 106  
85.7905 112  
85.8404 101  
85.8904 116  
85.9403 91  
85.9903 86

86.0402 105  
86.0902 88  
86.1402 127  
86.1901 116  
86.2401 97  
86.2900 117  
86.3400 104  
86.3899 111  
86.4399 112  
86.4898 113  
86.5398 97  
86.5897 121  
86.6397 112  
86.6897 133  
86.7396 99  
86.7896 93  
86.8395 91  
86.8895 87  
86.9394 105  
86.9894 99  
87.0393 109  
87.0893 113  
87.1393 91  
87.1892 82  
87.2392 114  
87.2891 100  
87.3391 114  
87.3890 99  
87.4390 106  
87.4889 111  
87.5389 104  
87.5888 109  
87.6388 110  
87.6888 105  
87.7387 108  
87.7887 77  
87.8386 103  
87.8886 105  
87.9385 104  
87.9885 123  
88.0384 102  
88.0884 109  
88.1383 109  
88.1883 101  
88.2383 128  
88.2882 108  
88.3382 82  
88.3881 106  
88.4381 106  
88.4880 97  
88.5380 96  
88.5879 96  
88.6379 108

88.6878 131  
88.7378 130  
88.7878 113  
88.8377 129  
88.8877 128  
88.9376 119  
88.9876 100  
89.0375 125  
89.0875 118  
89.1374 118  
89.1874 112  
89.2374 115  
89.2873 134  
89.3373 134  
89.3872 110  
89.4372 131  
89.4871 123  
89.5371 133  
89.5870 127  
89.6370 127  
89.6869 125  
89.7369 134  
89.7869 115  
89.8368 113  
89.8868 109  
89.9367 97  
89.9867 110  
90.0366 106  
90.0866 125  
90.1365 110  
90.1865 108  
90.2364 104  
90.2864 105  
90.3364 104  
90.3863 106  
90.4363 124  
90.4862 109  
90.5362 106  
90.5861 111  
90.6361 112  
90.6860 112  
90.7360 121  
90.7860 95  
90.8359 100  
90.8859 102  
90.9358 118  
90.9858 109  
91.0357 94  
91.0857 109  
91.1356 100  
91.1856 107  
91.2355 110  
91.2855 112

91.3355 102  
91.3854 106  
91.4354 104  
91.4853 109  
91.5353 106  
91.5852 103  
91.6352 101  
91.6851 100  
91.7351 110  
91.7850 119  
91.8350 91  
91.8850 86  
91.9349 107  
91.9849 107  
92.0348 98  
92.0848 100  
92.1347 102  
92.1847 121  
92.2346 86  
92.2846 97  
92.3346 111  
92.3845 93  
92.4345 102  
92.4844 102  
92.5344 77  
92.5843 108  
92.6343 96  
92.6842 112  
92.7342 110  
92.7841 95  
92.8341 109  
92.8841 120  
92.9340 92  
92.9840 117  
93.0339 114  
93.0839 93  
93.1338 97  
93.1838 103  
93.2337 122  
93.2837 113  
93.3336 109  
93.3836 113  
93.4336 102  
93.4835 91  
93.5335 129  
93.5834 97  
93.6334 93  
93.6833 106  
93.7333 124  
93.7832 113  
93.8332 98  
93.8831 109  
93.9331 107

93.9831 108  
94.0330 102  
94.0830 114  
94.1329 108  
94.1829 114  
94.2328 125  
94.2828 100  
94.3327 107  
94.3827 109  
94.4327 103  
94.4826 116  
94.5326 129  
94.5825 88  
94.6325 119  
94.6824 89  
94.7324 107  
94.7823 98  
94.8323 115  
94.8822 123  
94.9322 118  
94.9822 122



EDAX SPECTRA:

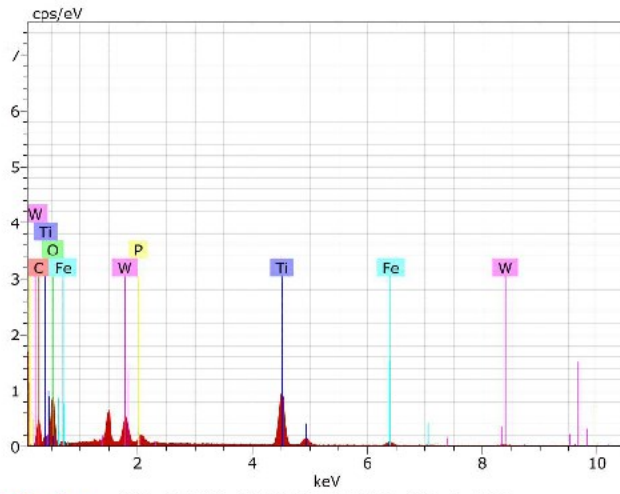

Ident-Spectrum Date: 3/2/2020 4:51:38 PM HV: 15.0kV Pulse th.: 1.11kps

Spectrum: test 6140

| Element    | Series   | unn. C [wt. %] | norm. C [wt. %] | Atom. C [at. %] | Error (3 Sigma) [wt. %] |
|------------|----------|----------------|-----------------|-----------------|-------------------------|
| Carbon     | K-series | 16.27          | 15.53           | 30.21           | 7.99                    |
| Oxygen     | K-series | 26.57          | 24.32           | 50.34           | 15.42                   |
| Titanium   | K-series | 30.86          | 29.47           | 14.33           | 2.86                    |
| Iron       | K-series | 4.91           | 4.69            | 1.96            | 0.70                    |
| Tungsten   | L-series | 15.26          | 14.57           | 1.85            | 2.49                    |
| Phosphorus | K-series | 0.87           | 0.83            | 0.62            | 0.21                    |
| Total:     |          | 104.73         | 100.00          | 100.00          |                         |

**Fe<sub>3</sub>O<sub>4</sub>-IR:**

Administrator 06 fe3o4 np

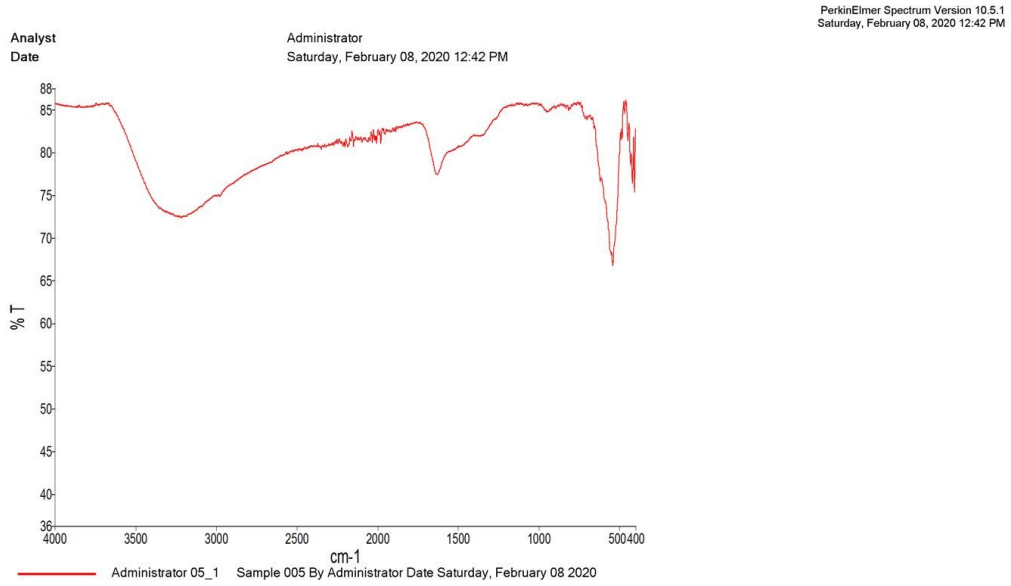

**Peak Number X (cm-1) Y (%T)**

|    |         |       |
|----|---------|-------|
| 1  | 3224.42 | 72.4  |
| 2  | 2204.43 | 80.69 |
| 3  | 2187.81 | 80.75 |
| 4  | 2150.75 | 80.79 |
| 5  | 2032.92 | 81.27 |
| 6  | 2006.99 | 81.16 |
| 7  | 1981.02 | 81.13 |
| 8  | 1628.21 | 77.46 |
| 9  | 950.63  | 84.83 |
| 10 | 540.1   | 66.74 |
| 11 | 483.02  | 81.73 |

|    |        |       |
|----|--------|-------|
| 12 | 467.79 | 84.68 |
| 13 | 447.98 | 81.47 |
| 14 | 431.89 | 78.66 |
| 15 | 419.58 | 76.45 |
| 16 | 406.52 | 75.4  |

PerkinElmer Spectrum Version 10.5.1  
Monday, March 09, 2020 4:19 PM

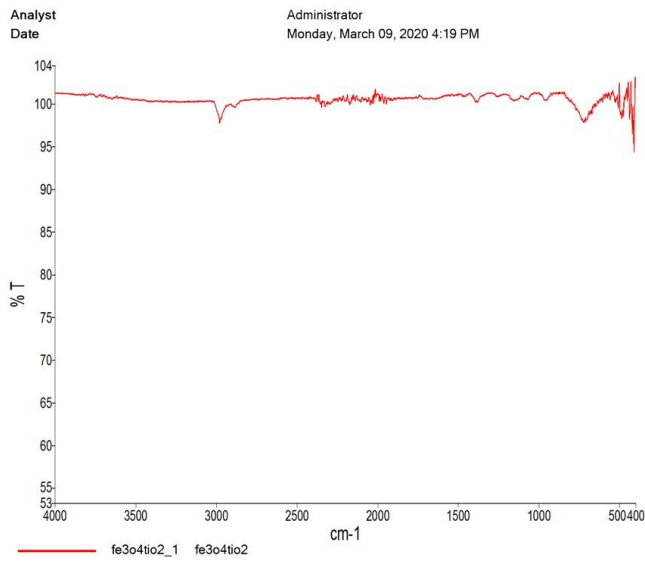

$\text{Fe}_3\text{O}_4\text{-TiO}_2$

| Peak Number | X (cm-1) | Y (%T) |
|-------------|----------|--------|
| 1           | 2981.64  | 97.78  |
| 2           | 2349.26  | 99.64  |
| 3           | 2173.06  | 99.95  |
| 4           | 2048.13  | 99.94  |
| 5           | 1946.27  | 100.07 |
| 6           | 1392.15  | 100.26 |

|    |        |        |
|----|--------|--------|
| 7  | 722.94 | 97.86  |
| 8  | 507.04 | 99.53  |
| 9  | 483.38 | 98.3   |
| 10 | 449.92 | 100.42 |
| 11 | 435.76 | 98.24  |
| 12 | 419.33 | 96.5   |
| 13 | 407.36 | 94.36  |

**Fe<sub>3</sub>O<sub>4</sub>@TiO<sub>2</sub>-PTA:**

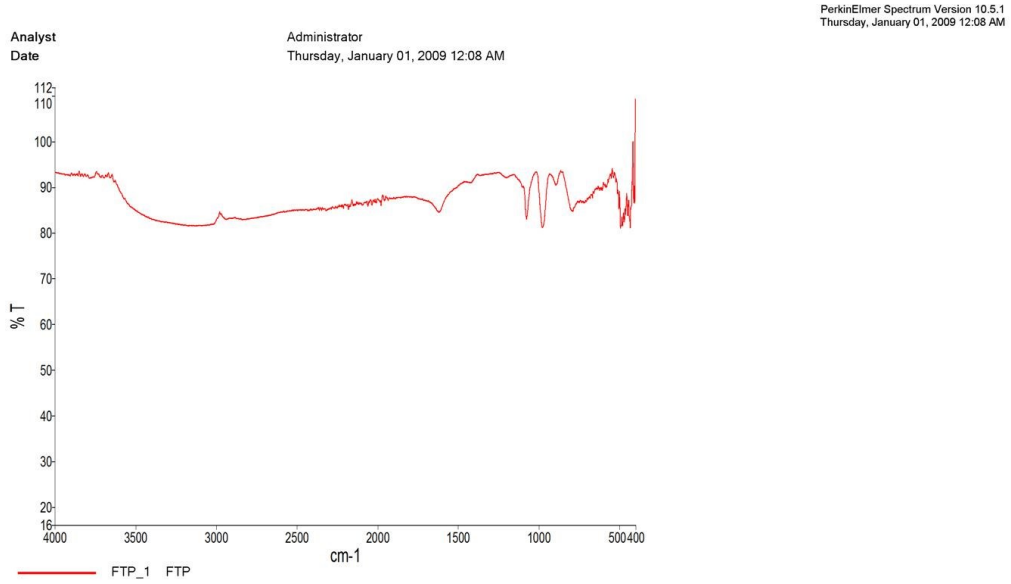

| Peak Number | X (cm-1) | Y (%T) |
|-------------|----------|--------|
| 1           | 3791.39  | 90.68  |
| 2           | 3698.38  | 90.75  |
| 3           | 3178.95  | 81.34  |
| 4           | 2842.29  | 82.57  |
| 5           | 2181.8   | 84.64  |
| 6           | 2153     | 85.3   |
| 7           | 2061.7   | 85.22  |

|    |         |       |
|----|---------|-------|
| 8  | 2036.78 | 85.44 |
| 9  | 1979.08 | 85.36 |
| 10 | 1620.77 | 84.06 |
| 11 | 1076.69 | 82.71 |
| 12 | 978.78  | 81.02 |
| 13 | 894.69  | 89.31 |
| 14 | 788.74  | 84.21 |
| 15 | 584.06  | 88.85 |
| 16 | 535.26  | 90.75 |
| 17 | 502.18  | 84.73 |
| 18 | 491.76  | 80.93 |
| 19 | 480.71  | 81.34 |
| 20 | 469.04  | 82.12 |
| 21 | 462.99  | 83.62 |
| 22 | 448.94  | 83.42 |
| 23 | 433.21  | 80.99 |
| 24 | 411.02  | 85.91 |
| 25 | 405.86  | 85.85 |

**VSM DATA OF Fe<sub>3</sub>O<sub>4</sub>-TiO<sub>2</sub>-PTA:**

Temperature (K),Magnetic Field (Oe),Moment (emu)

300.004058837891,-0.256723113358021,5.50178163523674E-6  
300.006072998047,110.06534576416,-6.88673990103451E-5  
300.00651550293,227.387794494629,-6.48816949364191E-7  
300.006652832031,404.821044921875,7.09849111148932E-5  
300.007049560547,614.607666015625,0.000150525593731548  
300.007568359375,804.520141601562,0.000245519428023214  
300.008209228516,1009.69830322266,0.000313804853399016  
300.008178710937,1204.51977539062,0.000381093808946422  
300.007690429687,1404.40063476562,0.000468805774997772  
300.007614135742,1644.28643798828,0.000543498343748726  
300.007781982422,1804.35021972656,0.000589645676454809  
300.007568359375,2027.12951660156,0.000666305597611206  
300.007171630859,2204.5751953125,0.000739748868618461  
300.006469726562,2424.46801757813,0.000799431163578804  
300.006286621094,2604.29931640625,0.000861696227882415  
300.006500244141,2809.66528320313,0.000930923555401199  
300.006286621094,3004.54956054687,0.000996721785413662  
300.006225585937,3204.41796875,0.00106902929961018  
300.006317138672,3404.57421875,0.00111639511154122  
300.004913330078,3609.53955078125,0.00117709607225012  
300.004699707031,3834.35363769531,0.0012513711689158  
300.00439453125,4004.39208984375,0.00128718150543437  
300.003234863281,4471.87231445313,0.00145848335654289  
300.003280639648,4504.40112304687,0.00145851751417228

300.002899169922,4614.7919921875,0.00148713666582282  
300.002258300781,4804.71728515625,0.00154689374716704  
300.001800537109,5004.8486328125,0.00159450583119719  
300.002380371094,5204.8544921875,0.00166638380482895  
300.002014160156,5404.7978515625,0.00170600937834396  
300.001586914063,5637.7646484375,0.00180417584297003  
300.001586914063,5802.73779296875,0.00184528069236727  
300.001678466797,6030.21313476563,0.00190013366407714  
300.001495361328,6200.25146484375,0.0019677671102925  
300.001983642578,6423.14331054687,0.00202846550243266  
300.001312255859,6823.53735351562,0.00214676871985036  
300.0009765625,6881.0498046875,0.00217450404423534  
300.00048828125,7006.1865234375,0.00218431686980061  
300.000717163086,7201.37109375,0.00224699656773048  
300.00048828125,7424.08813476563,0.00232345425066587  
300.000915527344,7601.671875,0.00236802023212031  
300.000366210937,8214.8955078125,0.00255197546517587  
300.000305175781,8252.5712890625,0.00257815804679588  
300.000671386719,8405.49072265625,0.00260804757039059  
300.00048828125,8613.2236328125,0.00266842609353443  
300.000579833984,8803.298828125,0.00271807180173721  
300.00032043457,9008.5009765625,0.0027931876089941  
300.000335693359,9204.125,0.00283996046732666  
300.000701904297,9404.34375,0.00291199681334684  
299.999542236328,9642.03173828125,0.00295641534498176  
300.000244140625,9809.7158203125,0.00302304553766135  
300.000305175781,10034.9677734375,0.00308202743856404  
300.000457763672,10200.5234375,0.00312553942670946  
300.000335693359,10420.779296875,0.00320246844827606  
300.000183105469,10600.8359375,0.00324009920151798  
299.999725341797,10811.0859375,0.00330789420759182  
299.999664306641,11001.0361328125,0.00336453069475808  
299.999755859375,11201.3681640625,0.00343464020348008  
300.000274658203,11401.51171875,0.00347883248377415  
300.000152587891,11604.22265625,0.00354407931797313  
300.000091552734,11834.4404296875,0.00361898571657964  
300.000305175781,12002.4443359375,0.00366028909706506  
300.000335693359,12225.1918945313,0.00371851247960966  
299.999938964844,12402.806640625,0.00377549301171232  
300.000183105469,12620.533203125,0.00383901313351066  
299.999893188477,12805.8002929688,0.00389925742624074  
299.999450683594,13004.02734375,0.00395799528728409  
299.999572753906,13204.6220703125,0.00401926250874795  
299.999908447266,13405.0908203125,0.00405698860888546  
300.000183105469,13600.65234375,0.00411876632365542  
300.000244140625,13801.6103515625,0.0041706122428559  
299.999603271484,14034.8334960938,0.00424776405477796  
299.999755859375,14207.7333984375,0.00429807487179704  
299.999420166016,14425.8349609375,0.00437705520159794  
299.9990234375,14603.875,0.00440739519687271  
299.998992919922,14814.6767578125,0.00447456399902944  
299.999267578125,15005.177734375,0.00452568695303966  
299.999481201172,15208.2138671875,0.00458260261204631

299.999145507812,15401.232421875,0.00465290687718001  
299.999328613281,15602.2041015625,0.00470845594659124  
299.999389648438,15802.810546875,0.00476187275312908  
299.999786376953,16003.5048828125,0.00482712440562562  
299.999633789063,16226.59765625,0.00488883971064415  
299.999771118164,16404.619140625,0.00493745056904699  
299.999725341797,16625.615234375,0.00500263790153939  
299.999694824219,16801.11328125,0.00504605943100207  
300.000091552734,17014.19921875,0.00510669211515722  
299.999847412109,17202.2265625,0.00516289852630686  
299.999877929687,17408.1953125,0.0052160870763502  
300.000030517578,17603.87890625,0.00528482497980375  
299.999969482422,17804.375,0.00533858821513842  
299.999969482422,18007.486328125,0.0053920059105135  
300.000030517578,18210.5859375,0.00545601433445356  
299.999969482422,18438.560546875,0.00552522833785853  
299.999633789063,18606.48828125,0.00557365524547175  
300.000030517578,18834.623046875,0.00562769876697535  
300.000152587891,19002.595703125,0.00569612566977676  
300.000274658203,19223.376953125,0.00574578363633285  
300.000610351562,19409.244140625,0.00580232150124824  
300.000152587891,19609.875,0.00584822294228019  
300.000045776367,19807.873046875,0.00591173781644769  
300.000411987305,19999.7578125,0.00598886540838628  
299.999786376953,19999.732421875,0.00601074788737027  
299.999542236328,19799.337890625,0.00604609657321305  
300.000213623047,19599.5703125,0.00601809774302654  
300.000381469727,19362.2265625,0.00594997074019972  
300.000640869141,19199.482421875,0.00590164083311649  
299.999710083008,18977.197265625,0.00583957561916369  
299.999725341797,18799.68359375,0.00576605634559355  
299.999847412109,18579.990234375,0.00571476151801244  
299.99983215332,18392.607421875,0.00565512912828333  
299.999542236328,18195.4453125,0.00558549341745627  
299.999542236328,17995.626953125,0.00552284458143557  
299.999938964844,17795.783203125,0.00547394200160032  
299.999328613281,17583.4853515625,0.00541969495573694  
299.999801635742,17396.021484375,0.0053424590105742  
300.000106811523,17168.3583984375,0.00528523038202742  
299.999359130859,16995.970703125,0.00523937054955649  
299.999755859375,16771.169921875,0.0051815873335172  
299.99934387207,16596.41015625,0.00513256802026085  
299.999176025391,16386.111328125,0.00505941241759339  
299.999755859375,16196.2734375,0.00500371480175066  
299.998931884766,15996.517578125,0.00494673313315728  
299.999664306641,15796.5859375,0.00488954544622137  
299.999267578125,15596.7177734375,0.00482784875374393  
299.998626708984,15366.5439453125,0.00476301039245335  
299.998840332031,15196.6435546875,0.00471084900232167  
299.999328613281,14974.3896484375,0.0046493570221548  
299.998657226562,14797.0439453125,0.0045864615504893  
299.999206542969,14584.6528320313,0.00452787305392893  
299.999877929687,14397.283203125,0.00448361079033191

299.999237060547,14197.46484375,0.00440624952179025  
299.999816894531,13997.634765625,0.00434752853741289  
300.000427246094,13797.8408203125,0.00429683706651449  
300.0009765625,13560.0961914062,0.00423772053398462  
300.000427246094,13397.7529296875,0.00419508430670446  
300.000732421875,13173.001953125,0.00411350186655127  
300.001098632812,12998.1669921875,0.00406968238530295  
300.000518798828,12782.8193359375,0.00399477610423601  
300.000885009766,12595.4682617188,0.00396163230330507  
300.000640869141,12395.6689453125,0.00389626540525319  
300.000793457031,12198.3173828125,0.00382950588846953  
300.001831054687,11998.5244140625,0.00378352812514628  
300.001434326172,11798.2802734375,0.00372143111393445  
300.001312255859,11598.4873046875,0.00365028711145982  
300.001556396484,11363.7294921875,0.00358373385232126  
300.001617431641,11198.8505859375,0.00354620358852052  
300.001708984375,10974.3125,0.00348351200125678  
300.00146484375,10794.3681640625,0.00341887330655285  
300.002197265625,10584.5185546875,0.00336359236374751  
300.001647949219,10394.681640625,0.00330668310057146  
300.001770019531,10197.4487304688,0.00324086491560254  
300.001892089844,9999.7412109375,0.00319915094311685  
300.001220703125,9799.935546875,0.00313505546973611  
300.001724243164,9570.13037109375,0.00306518908571826  
300.002075195313,9395.2275390625,0.00302498808736982  
300.002349853516,9175.390625,0.00294404731731007  
300.00244140625,8995.0771484375,0.0029003862640713  
300.001892089844,8782.7421875,0.00285358747579996  
300.001800537109,8595.5654296875,0.00278934514186848  
300.001983642578,8390.7255859375,0.00272580976730106  
300.001831054687,8195.453125,0.00266244108261155  
300.001525878906,7995.6474609375,0.00261716379033382  
300.001403808594,7795.7041015625,0.00254998517005737  
300.001708984375,7595.91064453125,0.00248491015633503  
300.001129150391,7371.06567382813,0.00243333964668556  
300.000732421875,7196.2744140625,0.00237893471402934  
300.001251220703,6974.00219726563,0.0023165440387808  
300.000778198242,6796.76318359375,0.00224621749319827  
300.001190185547,6586.9267578125,0.00219824961800516  
300.000823974609,6396.888671875,0.00213774020813986  
300.001647949219,6194.1904296875,0.00207252882213971  
300.001403808594,5996.939453125,0.00203427781638449  
300.002014160156,5797.09619140625,0.00196668120705581  
300.001525878906,5567.37255859375,0.0018982714488557  
300.001922607422,5397.04638671875,0.00186238732510268  
300.001159667969,5174.7802734375,0.00177876331033294  
300.000640869141,4997.49755859375,0.00172706417300315  
300.000640869141,4792.56982421875,0.00167491130587839  
300.000640869141,4592.72607421875,0.00162350580272743  
300.000579833984,4387.54833984375,0.00155271240368809  
300.000793457031,4197.66064453125,0.00149968752536074  
300.000732421875,3997.86767578125,0.00143907384082858  
300.000457763672,3758.08813476562,0.00135105541152423



300.000091552734,3598.45654296875,0.00131656329275184  
300.001480102539,3373.63610839844,0.00125802596493027  
300.001129150391,3198.7197265625,0.00120095484995388  
300.000457763672,2983.861328125,0.00113623968913881  
300.000610351562,2791.53820800781,0.00107681427989327  
300.000640869141,2591.34436035156,0.00101539455398584  
300.000823974609,2394.04931640625,0.000960516638765103  
300.000518798828,2199.31567382813,0.000913616620145613  
300.000244140625,1999.43481445313,0.000849940786330226  
300.001312255859,1799.22827148438,0.000787657259609496  
300.001403808594,1564.3955078125,0.000717496578316728  
300.000793457031,1399.46655273438,0.00067421154355687  
300.000305175781,1174.65234375,0.000576332550433779  
300.000152587891,999.830139160156,0.000529550006852676  
300.000381469727,782.128875732422,0.000478425151162671  
300.000671386719,594.858764648438,0.000409134265394177  
300.000305175781,395.053039550781,0.000331944909419949  
300.000350952148,195.109573364258,0.000251301826434128  
300.000122070313,-4.74624681472778,0.000159150198829878  
300.000198364258,-242.158760070801,2.96408154119069E-5  
300.000274658203,-404.558044433594,-5.12783408853215E-5  
299.999542236328,-626.811401367187,-0.000127641893407901  
299.999816894531,-804.144470214844,-0.000199188494070057  
299.999389648438,-1024.45043945312,-0.000287841344421703  
300.000183105469,-1204.39453125,-0.000349587200762208  
299.999908447266,-1404.12512207031,-0.000420033297724056  
299.999938964844,-1604.08117675781,-0.000480993171086388  
300.000091552734,-1803.97448730469,-0.000560765117164218  
300.001037597656,-2044.40502929687,-0.000645142190064868  
300.000427246094,-2204.28735351562,-0.000703824173629746  
299.999938964844,-2429.2080078125,-0.000788794256673988  
299.999847412109,-2604.07397460938,-0.000844154650668328  
300.000457763672,-2826.95349121094,-0.000901008672202303  
299.999969482422,-3009.32080078125,-0.000961577116298913  
300.000305175781,-3204.330078125,-0.00103500117060903  
300.000579833984,-3409.29541015625,-0.00110401418422788  
300.000701904297,-3604.29248046875,-0.00115211001260448  
300.00048828125,-3804.123046875,-0.001241283451401  
300.000274658203,-4009.1005859375,-0.00128335543661497  
300.000381469727,-4234.07177734375,-0.00134696676730107  
299.999938964844,-4406.58325195313,-0.00141512731744908  
300.000061035156,-4624.43505859375,-0.00145886701297676  
300.00048828125,-4804.62939453125,-0.00152956279451051  
300.000854492188,-5014.60400390625,-0.00160083869691333  
300.000457763672,-5209.56298828125,-0.00164917859238247  
300.000213623047,-5404.5478515625,-0.00168786253280616  
300.000305175781,-5605.01708984375,-0.00176104804708492  
300,-5800.013671875,-0.00182108730687596  
300.000732421875,-6044.9775390625,-0.00190591248283424  
300.00048828125,-6200.0634765625,-0.0019515629517239  
299.999725341797,-6432.7109375,-0.00201962524750823  
300.000183105469,-6600.57666015625,-0.00207103176357843  
299.999847412109,-6820.8076171875,-0.00212392223302482

300.000427246094,-7010.9580078125,-0.00218805407018691  
300.001098632812,-7208.62866210937,-0.00223509379404949  
299.999908447266,-7406.34912109375,-0.00230768728000213  
300.000518798828,-7601.521484375,-0.00235448222716921  
300.000564575195,-7801.84033203125,-0.00242185980770228  
300.000213623047,-8001.92138671875,-0.00247677812278565  
300.000640869141,-8242.17724609375,-0.00254011725749513  
300.000183105469,-8402.72265625,-0.00258459670718063  
300.000122070313,-8627.9755859375,-0.00265430310817024  
300.000335693359,-8803.0234375,-0.0027057848004281  
300.000610351562,-9020.736328125,-0.00277288378759211  
300.000274658203,-9203.8994140625,-0.00282240631285434  
299.999847412109,-9409.15234375,-0.00288099608839882  
299.999786376953,-9604.2998046875,-0.00293340465671149  
299.999908447266,-9804.505859375,-0.00300157155878172  
299.999969482422,-10004.6748046875,-0.00305995460704092  
300.000122070313,-10200.2607421875,-0.00312695896445453  
299.999649047852,-10427.9736328125,-0.00317695615042372  
300.000061035156,-10600.5986328125,-0.00323731270107216  
300.000518798828,-10828.3051757813,-0.00328684945001317  
300.000549316406,-11001.0859375,-0.00335638702439181  
299.999389648438,-11218.6181640625,-0.00340372804284029  
299.999114990234,-11406.283203125,-0.00347472747472607  
299.999328613281,-11603.9409179688,-0.00351822709939381  
299.999877929687,-11801.7119140625,-0.00356424476320562  
299.999145507812,-12002.15625,-0.00363145730559279  
299.999572753906,-12242.3994140625,-0.00370587665562456  
299.999816894531,-12402.505859375,-0.00375030477737926  
299.999893188477,-12632.7685546875,-0.00382419278886428  
300,-12803.01953125,-0.00387142467740997  
300.000061035156,-13018.7666015625,-0.00391979442422122  
300.000274658203,-13204.3212890625,-0.00398032515887929  
300.00016784668,-13407.30859375,-0.00404394493581786  
299.999816894531,-13600.3388671875,-0.00409452033217364  
300.000152587891,-13806.318359375,-0.00415941351253164  
299.999816894531,-14001.8544921875,-0.00422270107136977  
299.999664306641,-14202.498046875,-0.00427547326967638  
299.999877929687,-14430.6318359375,-0.00433556798252862  
300,-14603.6494140625,-0.00437678843564431  
300.000030517578,-14831.8515625,-0.00444736009873886  
299.999862670898,-15007.33203125,-0.00449629897877165  
299.999725341797,-15220.3251953125,-0.00457028551301778  
300.000335693359,-15400.8701171875,-0.00461417787450823  
300.000732421875,-15604.3129882812,-0.00466956630637236  
300.000640869141,-15802.4091796875,-0.00472579009587092  
299.999877929687,-16002.9912109375,-0.00478886304486506  
299.999725341797,-16308.73046875,-0.00486975565730356  
300.000152587891,-16406.572265625,-0.00489892594134787  
299.99983215332,-16632.6904296875,-0.00494935579215722  
299.999755859375,-16805.58203125,-0.00502542945544377  
299.999969482422,-17023.6845703125,-0.00507032948554041  
300.000244140625,-17201.7265625,-0.00512663752110289  
300.000274658203,-17417.310546875,-0.00519391511564159

300.000335693359,-17603.25390625,-0.00524071397645094  
300.000061035156,-17813.841796875,-0.00529994704209451  
300.000366210937,-18004.267578125,-0.00534740378806082  
300.000122070313,-18204.82421875,-0.00539964567807102  
300.000793457031,-18400.146484375,-0.00546930741257686  
300.000518798828,-18600.69140625,-0.00552391515786503  
300.000198364258,-18841.3173828125,-0.00559875147702541  
300.000091552734,-19004.341796875,-0.00563822402334241  
299.999938964844,-19227.421875,-0.00570255073066171  
300.000091552734,-19405.8134765625,-0.00575319021378169  
300.000061035156,-19613.845703125,-0.00581331888790793  
300.000579833984,-19804.359375,-0.0058703188077229  
300.000244140625,-19999.76953125,-0.0059408314975339  
300.000122070313,-19986.7080078125,-0.0059507246179654  
299.999710083008,-19796.9462890625,-0.00598773594310269  
300.000030517578,-19592.1435546875,-0.00598326598682699  
300.000579833984,-19189.58984375,-0.00585266079112835  
300.000442504883,-19154.6875,-0.00584040198821001  
300.000183105469,-18999.8515625,-0.00579576434817457  
300.000366210937,-18795.087890625,-0.00573398803910798  
300.001495361328,-18310.7568359375,-0.00558446877698063  
300.00146484375,-18163.310546875,-0.0055413765036918  
300.001358032227,-18133.3994140625,-0.00552607031056909  
300.000915527344,-17991.005859375,-0.00550530615648809  
300.000915527344,-17791.1484375,-0.00543126005505276  
300.000579833984,-17596.44140625,-0.00537314062702554  
300.000640869141,-17396.146484375,-0.00532358613100063  
300.000610351562,-17196.46484375,-0.00526783249538156  
299.999908447266,-16996.546875,-0.00519449626878811  
299.999954223633,-16766.69921875,-0.0051362222288172  
300.000091552734,-16596.8984375,-0.00508240270231613  
299.999923706055,-16371.6586914062,-0.00502734655077973  
300.000091552734,-16196.82421875,-0.00498154118413698  
300.000396728516,-15992.109375,-0.00491590547447972  
300.000305175781,-15797.3251953125,-0.00485403620530934  
300.000762939453,-15597.01953125,-0.00480016751555875  
300.000457763672,-15397.125,-0.00474903686860907  
299.999298095703,-15197.431640625,-0.00468075609826696  
299.99934387207,-14965.1669921875,-0.00461808455498125  
299.999969482422,-14797.87109375,-0.00457227781554719  
299.999908447266,-14572.8427734375,-0.00451085831720119  
299.999572753906,-14397.9345703125,-0.00443954728994957  
299.999755859375,-14178.3037109375,-0.00439432946246535  
299.999145507812,-13993.3388671875,-0.004337137947735  
299.999542236328,-13798.7177734375,-0.00427652246831461  
300,-13598.109375,-0.00420858988471964  
300.000152587891,-13398.50390625,-0.00415240935769534  
299.999542236328,-13198.76171875,-0.00410155251092441  
299.999603271484,-12998.955078125,-0.00406077953117397  
300.000091552734,-12766.2583007813,-0.00397151836139932  
300.000244140625,-12599.005859375,-0.00392870104163365  
299.999603271484,-12379.1640625,-0.00386513616263286  
299.999572753906,-12194.1728515625,-0.00382207607346031

300.000213623047,-11994.4296875,-0.0037604816707012  
300.000549316406,-11796.6586914062,-0.0036939466911833  
300.000854492188,-11594.3291015625,-0.00364326869272788  
300.000244140625,-11399.5087890625,-0.00358229036479014  
300.000610351562,-11199.689453125,-0.00352110400490974  
300.000213623047,-10960.1611328125,-0.00345503666238641  
300.000335693359,-10795.1943359375,-0.00341246998072505  
300.000274658203,-10575.33984375,-0.00334737751492873  
300.000213623047,-10395.5205078125,-0.00328141781545379  
300.000091552734,-10180.7744140625,-0.00322834470371462  
299.999725341797,-9995.5576171875,-0.00317373735390048  
299.999694824219,-9790.7802734375,-0.00310794953124313  
300.000213623047,-9595.9599609375,-0.00305169115800045  
299.999694824219,-9396.1787109375,-0.00299852685997374  
299.999801635742,-9160.97021484375,-0.0029418376120785  
300.000061035156,-8995.9912109375,-0.00289571721883891  
300.000122070313,-8766.205078125,-0.00281799003525238  
300.000335693359,-8596.4296875,-0.00276784355778493  
300.000305175781,-8381.646484375,-0.0027024437575175  
300.000122070313,-8196.4296875,-0.0026579022074439  
300.000183105469,-7991.5654296875,-0.00259582839249034  
299.999725341797,-7796.71875,-0.00253817576800795  
300.000091552734,-7596.8876953125,-0.00248667599483331  
299.999786376953,-7397.05712890625,-0.00242813860565931  
300.000030517578,-7197.17626953125,-0.00236220705806963  
300.000061035156,-6962.41821289063,-0.00229477641253982  
299.999694824222,-6797.65283203125,-0.00225069065487426  
300.000305175781,-6570.42065429688,-0.00219260576536251  
300.000152587891,-6392.568359375,-0.00211980610991998  
299.999664306641,-6192.7626953125,-0.00207484905833409  
299.999938964844,-5997.87841796875,-0.00202048893273534  
299.999877929687,-5798.185546875,-0.00194873633863314  
299.999725341797,-5598.3046875,-0.00191078340448983  
300.000152587891,-5393.0009765625,-0.00183390619339704  
299.999984741211,-5163.20263671875,-0.00178199162286876  
299.999938964844,-4998.423828125,-0.00173557522415321  
300.000091552734,-4773.572265625,-0.00165155207755701  
299.999694824219,-4598.412109375,-0.00161181060269963  
300.000015258789,-4380.92358398438,-0.00154557238374848  
300.000305175781,-4198.650390625,-0.00149376169336955  
299.999755859375,-3998.85668945313,-0.00143079123464338  
299.999740600586,-3799.03857421875,-0.0013719300791452  
300.000091552734,-3599.43334960937,-0.00131991573636725  
299.999938964844,-3359.60388183594,-0.00123310316093152  
299.999816894531,-3199.83447265625,-0.0011928616758069  
300.000274658203,-2972.51550292969,-0.00114086575120788  
299.999755859375,-2795.12622070313,-0.00108460857060635  
299.999816894531,-2584.888671875,-0.00101917668525896  
299.999572753906,-2390.04223632813,-0.000948611131775703  
300.000030517578,-2195.24560546875,-0.000899123522505804  
300.000183105469,-1995.47741699219,-0.000839402124323716  
299.999084472656,-1795.14587402344,-0.000787789182212249  
300,-1575.34069824219,-0.000702556646813603

299.999816894531,-1390.61279296875,-0.000651900746484831  
299.999847412109,-1168.19659423828,-0.000588057897515924  
300.000213623047,-995.847717285156,-0.000543544949265327  
300.000579833984,-768.078002929688,-0.000453075250718162  
300.000244140625,-590.788757324219,-0.000403515661773531  
299.999908447266,-388.547302246094,-0.000335517727153324  
300.000091552734,-196.136459350586,-0.000259142984083078  
300.000427246094,3.73187732696533,-0.000163978214930406  
300,203.700393676758,-6.14870329533556E-5  
300,403.606323242188,2.40917166151906E-5  
299.999847412109,635.884368896484,0.000139203602562374  
299.999755859375,803.230285644531,0.000209357231701531  
299.999694824219,1028.48291015625,0.000272435101202694  
300.000274658203,1203.35510253906,0.000356146678570949  
300.000091552734,1415.66516113281,0.000428971851574042  
299.999908447266,1603.06677246094,0.000493974502707392  
300.000183105469,1808.06958007813,0.000563152559240473  
300.000183105469,2003.40466308594,0.000612225483363507  
300.000427246094,2203.41064453125,0.000703107006216283  
300.000671386719,2403.24145507813,0.000762343777620346  
300.001098632812,2603.08471679687,0.000817205880576192  
300.000915527344,2830.8544921875,0.000908804307945919  
300.000152587891,3003.28466796875,0.000960878163257483  
299.999908447266,3225.73852539063,0.00103370399498817  
299.999633789063,3403.32202148438,0.00108699071535103  
300.000732421875,3615.826171875,0.00115593829127088  
300.000762939453,3805.73229980469,0.00120628847475991  
300.000244140625,4003.1650390625,0.00127796835223655  
300.000030517578,4203.14599609375,0.00134893875702434  
300.00048828125,4403.08935546875,0.0013952477812499  
300.000869750977,4641.08422851562,0.00148160030215878  
300.000915527344,4803.62744140625,0.00151439432871257  
300.000640869141,5031.02783203125,0.00157725281336578  
300.001098632812,5203.65185546875,0.00165009583833284  
300.000793457031,5428.69189453125,0.00170038085166646  
300.000183105469,5604.1025390625,0.00173923959850729  
299.999908447266,5809.10546875,0.00181791236804222  
299.999755859375,6004.05224609375,0.00187196202806847  
300.000091552734,6204.08349609375,0.00192125803691606  
300.000152587891,6404.5029296875,0.00199306935177554  
299.999664306641,6604.70947265625,0.00204883059649003  
300.000411987305,6834.97094726563,0.00212658184238852  
300.00048828125,7000.025390625,0.00216786227958041  
300.000061035156,7225.3408203125,0.00222661880742651  
299.999694824219,7400.388671875,0.00228663782255106  
300.000061035156,7610.61279296875,0.00234088931682303  
299.999694824219,7800.80078125,0.00240465664329178  
300,8001.0205078125,0.00246340059484256  
300.000305175781,8201.2392578125,0.00252175155168746  
300.000305175781,8401.87109375,0.00258021441726752  
299.999542236328,8614.61328125,0.00262397411423758  
300,8802.234375,0.00268552437080202  
300.000076293945,9027.49267578125,0.0027548326925029

299.999938964844,9203.123046875,0.00279721696719022  
300.000152587891,9423.341796875,0.00287608592297961  
300.000381469727,9603.5859375,0.00291869442167187  
300.000274658203,9813.7607421875,0.0029747538917718  
300.001037597656,10003.935546875,0.00304316007093098  
300.000335693359,10204.6435546875,0.00308909164174779  
299.999633789063,10404.775390625,0.00317268027131036  
300.000274658203,10604.818359375,0.00321148639727233  
300.000610351562,10835.1059570312,0.00326953368670244  
300.000274658203,11007.6044921875,0.00331574129760322  
300.000198364258,11225.318359375,0.00339132936105021  
300.000305175781,11400.53515625,0.00343716817959941  
299.999877929687,11625.7373046875,0.00355075891395863  
300.000244140625,11803.43359375,0.00355670943399726  
300.00048828125,12014.0151367188,0.00362708134940473  
300.000671386719,12204.1596679688,0.00366314872436017  
300.000335693359,12406.8642578125,0.00372028807766715  
300.000122070313,12602.0615234375,0.0037833084703067  
299.999847412109,12807.302734375,0.00383012769847446  
300.000091552734,13038.166015625,0.0039182423963535  
300.000396728516,13203.6455078125,0.00395434075673856  
299.999633789063,13429.2734375,0.00402453280937665  
299.999603271484,13604.796875,0.00407910248884598  
300.000350952148,13815.7861328125,0.0041316243466593  
300.000549316406,14011.345703125,0.00418745875119489  
300.000366210937,14211.8662109375,0.00424798762691504  
300.000701904297,14405.0346679688,0.00430222580071155  
300.000732421875,14603.0107421875,0.00436092787030511  
300.000732421875,14803.7197265625,0.00442596619412716  
300.000671386719,15009.3349609375,0.00447540497717519  
300.000579833984,15245.1201171875,0.00453760016263643  
299.999938964844,15402.9174804687,0.00457988053981139  
300.000091552734,15626.4228515625,0.00465668348684936  
300.000305175781,15801.896484375,0.00469507762687423  
300.001007080078,16017.78125,0.00474981246999409  
300.000518798828,16203.185546875,0.00480438987505647  
300.000747680664,16406.2607421875,0.00487417808127708  
299.999908447266,16604.763671875,0.00492878161355888  
300.000152587891,16800.298828125,0.00498743700612625  
300.000030517578,17000.806640625,0.00505128579861109  
300.000457763672,17201.400390625,0.00511143384979048  
300.000457763672,17432.4892578125,0.00514895860724912  
300.000305175781,17603.140625,0.00522557639397891  
299.999786376953,17828.755859375,0.00528117723840924  
300.000091552734,18004.28125,0.00532869535683494  
300.000183105469,18222.3818359375,0.00539909790279921  
299.999877929687,18510.474609375,0.00545974307005917  
300.000259399414,18723.673828125,0.00553840880984924  
300.000762939453,18801.287109375,0.00556156162300142  
300.000244140625,19001.880859375,0.00561091955108  
300.000305175781,19375.96484375,0.00571437866033499  
300.000610351562,19418.591796875,0.00573532260572938  
300.000076293945,19636.712890625,0.0058143860350335

299.999481201172,19804.609375,0.00583766440052965  
300.000854492188,19999.7578125,0.0059289274130315

**WATERS,Q-TOF MICROMASS (ESI-MS)**

NIKITA SPA 4 (0.134) AM (Top,4, Ar,4000.0,556.28,1.00,LS 10); Sm (Mn, 2x1.00); Sb (1,40.00); Cm (1:9-10:27)

SAIF/CIL,PANJAB UNIVERSITY,CHANDIGARH

1: TOF MS ES+  
6.92e4

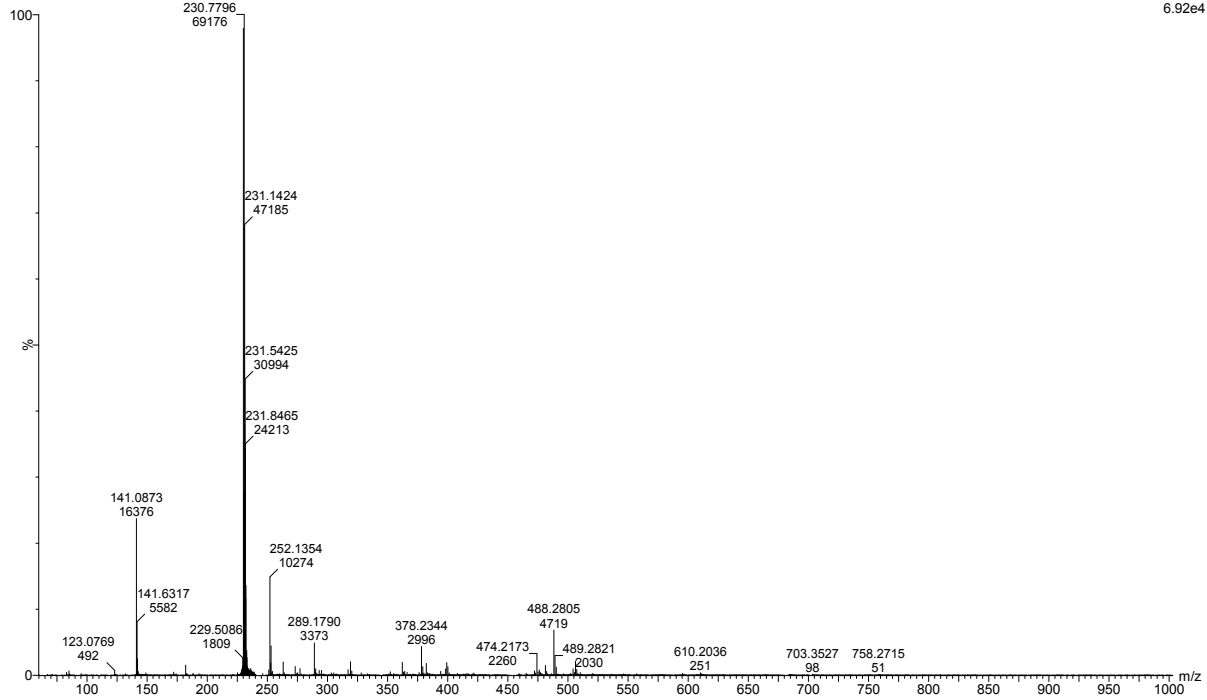

**WATERS,Q-TOF MICROMASS (ESI-MS)**

NIKITA SPA 4 (0.134) AM (Top,4, Ar,4000.0,556.28,1.00,LS 10); Sm (Mn, 2x1.00); Sb (1,40.00); Cm (1:9-10:27)

SAIF/CIL,PANJAB UNIVERSITY,CHANDIGARH

1: TOF MS ES+  
6.92e4

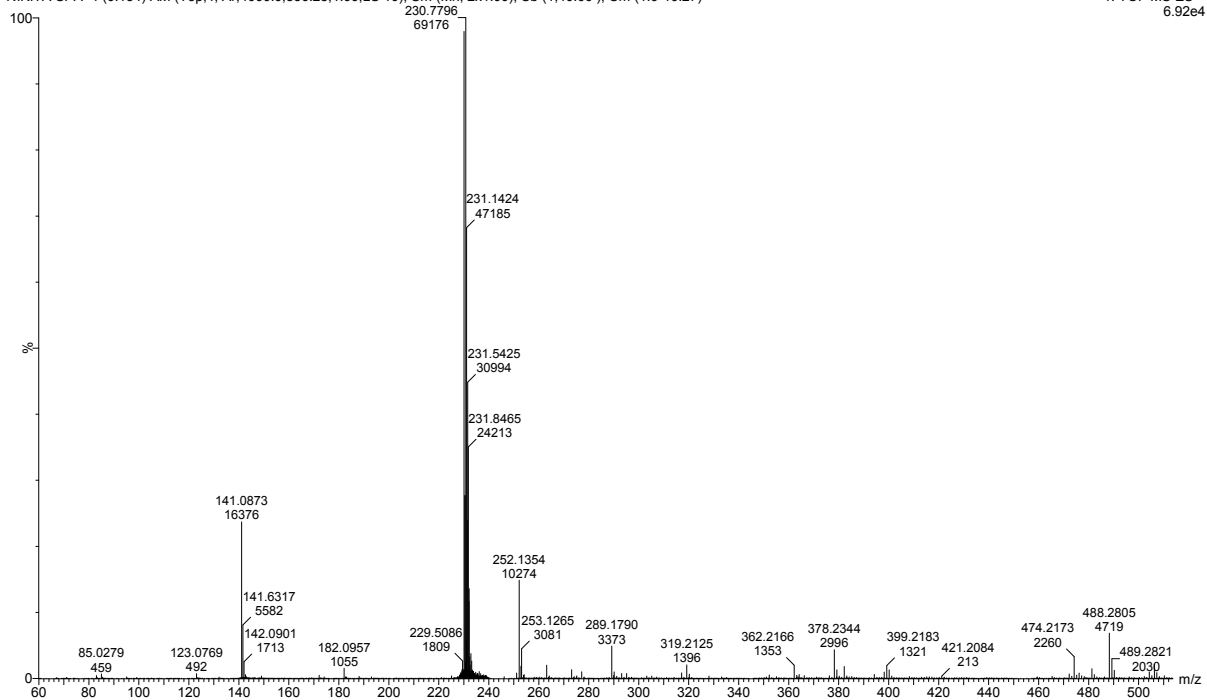

Mass spectrum of (4a) 3,3,6,6-tetramethyl-4',4'-diphenyl-10-(*p*-tolyl)-3,4,6,7-tetrahydro-1*H*-spiro[acridine-9,2'-imidazolidine]-1,5',8(2*H*,5*H*,10*H*)-trione

Table A: Calculation of E-factor, mass intensity and atom economy for the reaction of 5,5 Dimethyl-1,3-cyclohexanedione, *p*-toluidine, and phenytoin in the presence of PEG 200:

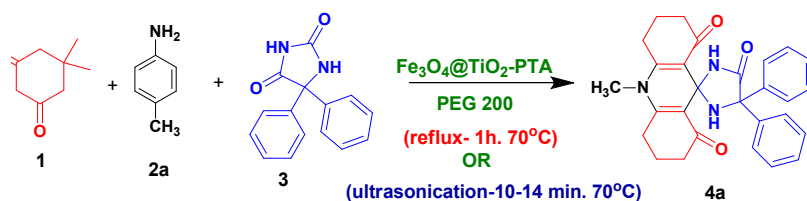

- **Total amount of reactants** = Reactant 1 + Reactant (2a) + Reactant 3  
 = 0.2803 gm + 0.1071 gm + 0.2522 gm  
 = 0.6396 gm
- **Amount of final product (4a) = 0.6143 gm**
- **Amount of waste** = Total amount of reactants- amount of final product  
 = 0.6396 gm-0.6143 gm  
 = 0.0253 gm
- E Factor = Amount of waste/Amount of Product = 0.0253/0.6143 = 0.0411  
 Thus,

$$\text{E Factor} = 0.0411$$

- **Process Mass Intensity (PMI)**  
 Process mass intensity = E Factor + 1 = 0.0411 + 1 = 1.0411  
 Thus,

$$\text{PMI} = 1.0411$$

- **Atom Economy (AE)**

$$\text{Atom Economy} = \frac{\text{MW of desired product}}{\sum \text{of molecular weight of stoichiometric reactants}} \times 100$$

$$\text{Atom Economy} = \frac{0.6143}{0.6396} \times 100 = 96.04\%$$
